# Supplementary material
Source: publisher figshare collection journal article supplement (https://karger.figshare.com/articles/dataset/_/27331026)
Supplement: Supplementary file 1 [file 3]

**Supplementary Material**

**Supplementary Table 1. Baseline characteristics by the presence of prolonged QTc (≥95th percentile) of 2,4611 participants in Guangzhou Biobank Cohort Study recruited from 2003 to 2008.**

This table compares baseline characteristics between participants with normal and prolonged QTc intervals (≥95th percentile) across multiple demographic and health-related factors.

**Supplementary Table 2. Rates and HRs (95% CIs) of all-cause mortality, CVD mortality, incident CVD and specific CVD for prolonged QTc (≥95th percentile) in 1,733 participants of Guangzhou Biobank Cohort Study from 2003 to 2008 and followed up until July 2022.**

This is a sensitivity analysis with further adjustments for hypokalemia.

**Supplementary Table 3. Rates and HRs (95% CIs) of incident CVD, coronary heart disease, myocardial infarction and ischemic event for prolonged QTc (≥95th percentile) by sex in 1,733 participants of Guangzhou Biobank Cohort Study from 2003 to 2008, followed up until July 2022.**

This table presents a stratified analysis by sex, showing the rates and hazard ratios for incident CVD, coronary heart disease, myocardial infarction, and ischemic events. The analysis was conducted based on findings from Supplementary Table 2, which indicated an interaction between prolonged QTc and sex in relation to these outcomes.

**Supplementary Table 4. Hazard ratios, sensitivity, specificity, PPV, NPV and continuous NRI of prolonged QTc (≥98th percentile) for all-cause mortality, CVD mortality and incident CVD.**

This table provides statistical metrics for prolonged QTc (≥98th percentile) in predicting all-cause mortality, CVD mortality, and incident CVD. It includes hazard ratios, sensitivity, specificity, PPV, NPV, and NRI, highlighting the predictive value of prolonged QTc for these outcomes.

**Supplementary Table 5. Rates and HRs (95% CIs) of specific CVD for prolonged QTc (≥98th percentile) in Guangzhou Biobank Cohort Study from 2003 to 2008 and followed up until July 2022.**

This table presents the relationship between prolonged QTc (≥98th percentile) and various CVD outcomes, including coronary heart disease, myocardial infarction, ischemic event (coronary heart disease or ischemic stroke), heart failure, stroke, ischemic stroke and hemorrhagic stroke.

**Supplementary Figure 1. Distribution of the uncorrected and corrected QT (QTc) in men (A) and women (B).**

This figure shows the distribution of both uncorrected QT and QTc (corrected QT interval) among men and women participants. Panel A illustrates the distribution for men, while panel B presents the distribution for women.

Supplementary Table 1. Baseline characteristics by the presence of prolonged QTc (≥95th percentile) of 2,4611 participants in Guangzhou Biobank Cohort Study recruited from 2003 to 2008.

|  | QTb | | QTfri | | QTfra | | QTh | |
| --- | --- | --- | --- | --- | --- | --- | --- | --- |
|  | Normal | Prolonged | Normal | Prolonged | Normal | Prolonged | Normal | Prolonged |
| Number (row %) | 23,395 (95.06) | 1,216 (4.94) | 23,367 (94.95) | 1,244 (5.05) | 23,368 (94.95) | 1,243 (5.05) | 23,350 (94.88) | 1,261 (5.12) |
| Sex, men % | 6,201 (26.51) | 318 (26.15) | 6,198 (26.52) | 321 (25.80) | 6,191 (26.49) | 328 (26.39) | 6,196 (26.54) | 323 (25.61) |
| Age,a years | 61.61 (7.04) | 62.90 (7.60)*** | 61.62 (7.05) | 62.72 (7.48)*** | 61.62 (7.05) | 62.71 (7.49)*** | 61.62 (7.05) | 62.75 (7.52)*** |
| Education, % |  |  |  |  |  |  |  |  |
| Primary or below | 9,969 (42.63) | 600 (49.38)*** | 9,949 (42.60) | 620 (49.84)*** | 9,958 (42.64) | 611 (49.16)*** | 9,940 (42.59) | 629 (49.92)*** |
| Middle school | 11,417 (48.83) | 522 (42.96) | 11,402 (48.82) | 537 (43.17) | 11,397 (48.80) | 542 (43.60) | 11,386 (48.79) | 553 (43.89) |
| College or above | 1,997 (8.54) | 93 (7.65) | 2,003 (8.58) | 87 (6.99) | 2,000 (8.56) | 90 (7.24) | 2,012 (8.62) | 78 (6.19) |
| Occupation, % |  |  |  |  |  |  |  |  |
| Non-manual | 14,477 (62.25) | 770 (63.74) | 14,447 (62.19) | 800 (64.83)* | 14,451 (62.20) | 796 (64.51) | 14,424 (62.13) | 823 (65.79)* |
| Manual | 5,331 (22.92) | 250 (20.70) | 5,338 (22.98) | 243 (19.69) | 5,331 (22.95) | 250 (20.26) | 5,334 (22.98) | 247 (19.74) |
| Other | 3,450 (14.83) | 188 (15.56) | 3,447 (14.84) | 191 (15.48) | 3,450 (14.85) | 188 (15.24) | 3,457 (14.89) | 181 (14.47) |
| Annual household income, RMB/year % | | |  |  |  |  |  |  |
| <30,000 | 8,793 (37.64) | 496 (40.82) | 8,802 (37.72) | 487 (39.18) | 8,805 (37.73) | 484 (38.97) | 8,803 (37.76) | 486 (38.57) |
| ≥30,000 | 8,950 (38.31) | 454 (37.37) | 8,920 (38.23) | 484 (38.94) | 8,920 (38.23) | 484 (38.97) | 8,924 (38.27) | 480 (38.10) |
| Not reported | 5,618 (24.05) | 265 (21.81) | 5,611 (24.05) | 272 (21.88) | 5,609 (24.04) | 274 (22.06) | 5,589 (23.97) | 294 (23.33) |
| Smoking status, % |  |  |  |  |  |  |  |  |
| Never | 18,974 (81.35) | 986 (81.49) | 18,959 (81.38) | 1,001 (80.92) | 18,963 (81.39) | 997 (80.66) | 18,939 (81.35) | 1,021 (81.35) |
| Former | 2,015 (8.64) | 107 (8.84) | 2,007 (8.61) | 115 (9.30) | 2,004 (8.60) | 118 (9.55) | 2,010 (8.63) | 112 (8.92) |
| Current | 2,336 (10.02) | 117 (9.67) | 2,332 (10.01) | 121 (9.78) | 2,332 (10.01) | 121 (9.79) | 2,331 (10.01) | 122 (9.72) |
| Alcohol use, % |  |  |  |  |  |  |  |  |
| Never | 14,420 (67.11) | 696 (65.54) | 14,419 (67.17) | 697 (64.42) | 14,409 (67.13) | 707 (65.16) | 14,400 (67.14) | 716 (65.03) |
| Former | 516 (2.40) | 37 (3.48) | 523 (2.44) | 30 (2.77) | 523 (2.44) | 30 (2.76) | 522 (2.43) | 31 (2.82) |
| Current | 6,551 (30.49) | 329 (30.98) | 6,525 (30.40) | 355 (32.81) | 6,532 (30.43) | 348 (32.07) | 6,526 (30.43) | 354 (32.15) |
| Physical activity, % |  |  |  |  |  |  |  |  |
| Inactive | 1,846 (7.89) | 117 (9.62) | 1,846 (7.90) | 117 (9.41) | 1,844 (7.89) | 119 (9.57) | 1,851 (7.93) | 112 (8.88) |
| Moderate | 9,326 (39.86) | 480 (39.47) | 9,306 (39.83) | 500 (40.19) | 9,304 (39.82) | 502 (40.39) | 9,307 (39.86) | 499 (39.57) |
| Active | 12,223 (52.25) | 619 (50.90) | 12,215 (52.27) | 627 (50.40) | 12,220 (52.29) | 622 (50.04) | 12,192 (52.21) | 650 (51.55) |
| SBP,a mmHg | 129.48 (21.83) | 138.23 (23.54)*** | 129.59 (21.85) | 136.05 (23.94)*** | 129.61 (21.86) | 135.59 (23.83)*** | 129.58 (21.83) | 136.02 (24.19)*** |
| DBP,a mmHg | 73.33 (11.14) | 77.19 (11.89)*** | 73.39 (11.16) | 75.87 (11.82)*** | 73.41 (11.16) | 75.63 (11.83)*** | 73.42 (11.16) | 75.43 (11.82)*** |
| Hypertension, yes % | 9,269 (39.66) | 686 (56.46)*** | 9,295 (39.82) | 660 (53.14)*** | 9,301 (39.84) | 654 (52.70)*** | 9,287 (39.81) | 668 (53.06)*** |
| Diabetes, yes % | 2,733 (11.71) | 208 (17.16)*** | 2,778 (11.92) | 163 (13.16) | 2,775 (11.91) | 166 (13.41) | 2,779 (11.93) | 162 (12.92) |
| LVH, yes % | 608 (2.60) | 54 (4.44)*** | 597 (2.55) | 65 (5.23)*** | 597 (2.55) | 65 (5.23)*** | 592 (2.54) | 70 (5.55)*** |
| BMI,a kg/m2 | 23.72 (3.30) | 24.02 (3.55)** | 23.72 (3.30) | 23.97 (3.48)** | 23.72 (3.30) | 23.97 (3.49)* | 23.73 (3.30) | 23.88 (3.46) |
| FPG,b mmol/l | 5.40 (4.99-5.90) | 5.50 (5.04-6.20)*** | 5.40 (4.99-5.90) | 5.40 (5.00-6.00) | 5.40 (4.99-5.90) | 5.40 (5.00-6.00) | 5.40 (4.99-5.90) | 5.40 (5.00-5.99) |
| TC,a mmol/l | 5.92 (1.13) | 5.92 (1.12) | 5.93 (1.14) | 5.86 (1.09)* | 5.93 (1.14) | 5.85 (1.09)* | 5.93 (1.14) | 5.85 (1.09)* |
| LDL-c,a mmol/l | 3.26 (0.70) | 3.31 (0.71)* | 3.26 (0.71) | 3.28 (0.68) | 3.26 (0.71) | 3.27 (0.69) | 3.26 (0.71) | 3.27 (0.68) |
| HDL-c,a mmol/l | 1.67 (0.40) | 1.63 (0.40)** | 1.67 (0.40) | 1.65 (0.41) | 1.67 (0.40) | 1.65 (0.40) | 1.67 (0.40) | 1.65 (0.40) |
| TG,b mmol/l | 1.37 (0.99-1.94) | 1.57 (1.11-2.37)*** | 1.37 (0.99-1.95) | 1.49 (1.05-2.16)*** | 1.37 (0.99-1.95) | 1.48 (1.05-2.17)*** | 1.37 (0.99-1.95) | 1.45 (1.03-2.12)*** |

BMI, body mass index; DBP, diastolic blood pressure; FPG, fasting plasma glucose; HDL-c, high-density lipoprotein cholesterol; LDL-c, low-density lipoprotein cholesterol; LVH, left ventricular hypertrophy; QTb, Bazett formula; QTc, corrected QT; QTfra, Framingham formula; QTfri, Fridericia formula; QTh, Hodges formula; SBP, systolic blood pressure; TC, total cholesterol; TG, triglyceride.

*: *P* < 0.05; **: *P* < 0.01; ***: *P* < 0.001

a: Results were expressed as mean (standard deviation).

b: Results were expressed as median (25th percentile-75th percentile).

Supplementary Table 2. Rates and HRs (95% CIs) of all-cause mortality, CVD mortality, incident CVD and specific CVD for prolonged QTc (≥95th percentile) in 1,733 participants of Guangzhou Biobank Cohort Study from 2003 to 2008 and followed up until July 2022.

| QTc | Number of events  (Rate, per 1,000person-years) | | Crude HR (95% CI) | Adjusted HR (95% CI) a | *P* for sex  interaction |
| --- | --- | --- | --- | --- | --- |
| Normal | Prolonged |
| **All-cause mortality** | | | | | |
| QTb | 198 (8.47) | 23 (14.83) | 1.78 (1.16 to 2.74)** | 1.64 (0.99 to 2.71) | 0.99 |
| QTfri | 196 (8.36) | 25 (16.94) | 2.07 (1.36 to 3.13)** | 1.40 (0.84 to 2.34) | 0.95 |
| QTfra | 197 (8.40) | 24 (16.37) | 1.98 (1.30 to 3.03)** | 1.46 (0.87 to 2.47) | 0.87 |
| QTh | 194 (8.30) | 27 (17.40) | 2.14 (1.43 to 3.19)*** | 1.57 (0.96 to 2.54) | 0.35 |
| **CVD mortality** | | | | | |
| QTb | 48 (2.05) | 8 (5.16) | 2.56 (1.21 to 5.42)* | 1.60 (0.61 to 4.20) | 0.46 |
| QTfri | 47 (2.00) | 9 (6.10) | 3.12 (1.53 to 6.37)** | 1.26 (0.47 to 3.41) | 0.14 |
| QTfra | 47 (2.00) | 9 (6.14) | 3.13 (1.54 to 6.40)** | 1.39 (0.51 to 3.77) | 0.19 |
| QTh | 46 (1.97) | 10 (6.44) | 3.35 (1.69 to 6.65)** | 1.48 (0.59 to 3.71) | 0.43 |
| **incident CVD** | | | | | |
| QTb | 234 (10.47) | 26 (18.04) | 1.77 (1.18 to 2.66)** | 1.72 (1.07 to 2.76)* | 0.17 |
| QTfri | 228 (10.16) | 32 (23.78) | 2.43 (1.68 to 3.52)*** | 2.12 (1.37 to 3.28)** | 0.01 |
| QTfra | 230 (10.25) | 30 (22.29) | 2.25 (1.54 to 3.29)*** | 1.99 (1.27 to 3.12)** | 0.01 |
| QTh | 230 (10.29) | 30 (20.83) | 2.08 (1.42 to 3.04)*** | 1.73 (1.10 to 2.71)* | 0.08 |
| **Coronary heart disease** | | | | | |
| QTb | 101 (4.41) | 8 (5.26) | 1.20 (0.58 to 2.47) | 1.50 (0.68 to 3.35) | 0.45 |
| QTfri | 94 (4.09) | 15 (10.53) | 2.61 (1.51 to 4.50)** | 2.61 (1.40 to 4.86)** | 0.03 |
| QTfra | 95 (4.13) | 14 (9.86) | 2.41 (1.37 to 4.22)** | 2.42 (1.27 to 4.61)** | 0.02 |
| QTh | 96 (4.19) | 13 (8.59) | 2.45 (1.15 to 3.68)* | 2.05 (1.05 to 4.01)* | 0.07 |
| **Myocardial infarction** | | | | | |
| QTb | 38 (1.64) | 5 (3.24) | 1.99 (0.78 to 5.06) | 1.81 (0.59 to 5.60) | 0.15 |
| QTfri | 32 (1.37) | 11 (7.59) | 5.57 (2.81 to 11.05)*** | 5.03 (2.14 to 11.85)*** | <0.001 |
| QTfra | 32 (1.37) | 11 (7.64) | 5.61 (2.83 to 11.12)*** | 5.08 (2.17 to 11.94)*** | <0.001 |
| QTh | 33 (1.42) | 10 (6.53) | 4.61 (2.27 to 9.36)*** | 3.99 (1.62 to 9.82)** | 0.002 |
| **Ischemic event (coronary heart disease or ischemic stroke)** | | | | | |
| QTb | 193 (8.58) | 21 (14.39) | 1.72 (1.10 to 2.70)* | 1.69 (1.01 to 2.85)* | 0.17 |
| QTfri | 188 (8.33) | 26 (18.91) | 2.34 (1.55 to 3.53)*** | 2.10 (1.30 to 3.40)** | 0.01 |
| QTfra | 190 (8.41) | 24 (17.46) | 2.13 (1.39 to 3.25)** | 1.94 (1.18 to 3.19)* | 0.004 |
| QTh | 190 (8.45) | 24 (16.33) | 1.97 (1.29 to 3.01)** | 1.72 (1.04 to 2.84)* | 0.04 |
| **Heart failure** | | | | | |
| QTb | 10 (0.43) | 0 (0.00) | / | / | / |
| QTfri | 10 (0.43) | 0 (0.00) | / | / | 1.00 |
| QTfra | 10 (0.43) | 0 (0.00) | / | / | 1.00 |
| QTh | 10 (0.43) | 0 (0.00) | / | / | 1.00 |
| **Stroke** | | | | | |
| QTb | 128 (5.61) | 20 (13.62) | 2.50 (1.56 to 3.40)*** | 2.08 (1.18 to 3.67)* | 0.16 |
| QTfri | 129 (5.63) | 19 (13.63) | 2.50 (1.54 to 4.04)*** | 1.97 (1.10 to 3.54)* | 0.06 |
| QTfra | 130 (5.67) | 18 (12.97) | 2.35 (1.44 to 3.85)** | 1.87 (1.02 to 3.42)* | 0.09 |
| QTh | 129 (5.65) | 19 (12.87) | 2.34 (1.44 to 3.79)** | 1.70 (0.95 to 3.04) | 0.22 |
| **Ischemic stroke** | | | | | |
| QTb | 96 (4.11) | 14 (9.06) | 2.78 (1.58 to 4.88)*** | 2.05 (1.01 to 4.17)* | / |
| QTfri | 98 (4.19) | 12 (8.16) | 2.58 (1.42 to 4.71)** | 2.09 (0.98 to 4.46) | 0.42 |
| QTfra | 99 (4.23) | 11 (7.53) | 2.30 (1.23 to 4.29)** | 1.90 (0.85 to 4.24) | / |
| QTh | 98 (4.20) | 12 (7.76) | 2.38 (1.31 to 4.35)** | 1.71 (0.80 to 3.62) | 0.40 |
| **H****emorrhagic stroke** | | | | | |
| QTb | 14 (0.60) | 3 (1.94) | 3.24 (0.93 to 11.28) | 0.92 (0.12 to 6.99) | 1.00 |
| QTfri | 14 (0.60) | 3 (2.04) | 3.43 (0.98 to 11.93) | 1.71 (0.24 to 12.00) | 1.00 |
| QTfra | 14 (0.60) | 3 (2.05) | 3.45 (0.99 to 12.01) | 1.90 (0.28 to 12.77) | 1.00 |
| QTh | 14 (0.60) | 3 (1.94) | 3.25 (0.93 to 11.30) | 1.35 (0.21 to 8.70) | / |

CI, confidence interval; CVD, cardiovascular disease; HR, hazard ratio; QTb, Bazett formula; QTc, corrected QT; QTfra, Framingham formula; QTfri, Fridericia formula; QTh, Hodges formula.

*: *P* < 0.05; **: *P* < 0.01; ***: *P* < 0.001

a: Hazard ratios were adjusted for sex, age, education, occupation, annual household income, smoking status, alcohol use, physical activity, hypertension, diabetes, left ventricular hypertrophy, body mass index, triglyceride and hypokalemia.

Supplementary Table 3. Rates and HRs (95% CIs) of incident CVD, coronary heart disease, myocardial infarction and ischemic event for prolonged QTc (≥95th percentile) by sex in 1,733 participants of Guangzhou Biobank Cohort Study from 2003 to 2008, followed up until July 2022.

| QTc | Sex | Crude HR (95% CI) | Adjusted HR (95% CI) a |
| --- | --- | --- | --- |
| **incident CVD** | | | |
| QTb | Men | 1.50 (0.85-2.65) | 1.17 (0.61-2.25) |
|  | Women | 2.19 (1.22-3.91)** | 2.66 (1.29-5.49)** |
| QTfri | Men | 1.95 (1.16-3.27)* | 1.21 (0.65-2.24) |
|  | Women | 3.17 (1.86-5.39)*** | 4.78 (2.50-9.15)*** |
| QTfra | Men | 1.75 (1.01-3.03)* | 1.06 (0.55-2.06) |
|  | Women | 3.02 (1.77-5.140*** | 4.53 (2.37-8.66)*** |
| QTh | Men | 1.80 (1.06-3.07)* | 1.08 (0.57-2.05) |
|  | Women | 2.52 (1.46-4.35)** | 3.10 (1.61-5.96)** |
| **Coronary heart disease** | | | |
| QTb | Men | 1.16 (0.47 to 2.87) | 0.92 (0.31 to 2.69) |
|  | Women | 1.34 (0.41 to 4.35) | 2.97 (0.82 to 10.82) |
| QTfri | Men | 1.95 (0.94 to 4.07) | 1.09 (0.43 to 2.77) |
|  | Women | 4.06 (1.78 to 9.28)** | 8.07 (3.17 to 20.54)*** |
| QTfra | Men | 1.76 (0.81 to 3.85) | 0.92 (0.34 to 2.51) |
|  | Women | 3.89 (1.70 to 8.88)** | 8.05 (3.16 to 20.51)*** |
| QTh | Men | 1.70 (0.78 to 3.70) | 0.85 (0.31 to 2.33) |
|  | Women | 2.93 (1.22 to 7.03)* | 5.39 (2.04 to 14.20)** |
| **Myocardial infarction** | | | |
| QTb | Men | 1.69 (0.51 to 5.55) | 0.84 (0.16 to 4.43) |
|  | Women | 2.92 (0.64 to 13.32) | 18.98 (2.44 to 147.77)** |
| QTfri | Men | 3.02 (1.16 to 7.86)* | 1.11 (0.26 to 4.85) |
|  | Women | 16.67 (5.38 to 51.69)*** | 384.81 (15.85 to 9342.02)*** |
| QTfra | Men | 3.21 (1.23 to 8.36)* | 1.16 (0.27 to 4.92) |
|  | Women | 15.94 (5.15 to 49.49)*** | 384.81 (15.85 to 9342.015)*** |
| QTh | Men | 3.09 (1.19 to 8.05)* | 1.06 (0.25 to 4.62) |
|  | Women | 10.36 (3.29 to 32.64)*** | 81.15 (9.92 to 663.39)*** |
| **Ischemic event (coronary heart disease or ischemic stroke)** | | | |
| QTb | Men | 1.46 (0.79 to 2.71) | 1.09 (0.53 to 2.22) |
|  | Women | 2.16 (1.12 to 4.19)* | 3.00 (1.33 to 6.79)** |
| QTfri | Men | 1.76 (0.99 to 3.13) | 1.05 (0.52 to 2.11) |
|  | Women | 3.33 (1.84 to 6.02)*** | 5.57 (2.71 to 11.45)*** |
| QTfra | Men | 1.53 (0.82 to 2.83) | 0.88 (0.41 to 1.88) |
|  | Women | 3.17 (1.76 to 5.74)*** | 5.29 (2.57 to 10.86)*** |
| QTh | Men | 1.61 (0.89 to 2.91) | 0.92 (0.44 to 1.90) |
|  | Women | 2.60 (1.41 to 4.80)** | 3.72 (1.79 to 7.74)*** |

CI, confidence interval; CVD, cardiovascular disease; HR, hazard ratio; QTb, Bazett formula; QTc, corrected QT; QTfra, Framingham formula; QTfri, Fridericia formula; QTh, Hodges formula.

*: *P* < 0.05; **: *P* < 0.01; ***: *P* < 0.001

a: Hazard ratios were adjusted for age, education, occupation, annual household income, smoking status, alcohol use, physical activity, hypertension, diabetes, left ventricular hypertrophy, body mass index, triglyceride and hypokalemia.

Supplementary Table 4. Hazard ratios, sensitivity, specificity, PPV, NPV and continuous NRI of prolonged QTc (≥98th percentile) for all-cause mortality, CVD mortality and incident CVD.

| Prolonged QTc | Crude HR  (95% CI) | Adjusted HR  (95% CI) a | *P* for sex  interaction | Sens (%) | Spec (%) | PPV (%) | NPV (%) | NRI (95% CI) |
| --- | --- | --- | --- | --- | --- | --- | --- | --- |
| **All-cause mortality** | | | | | | | | |
| **Men** |  |  |  |  |  |  |  |  |
| QTb | 1.31 (0.99 to 1.75) | 1.22 (0.90 to 1.67) | - | 2.19 | 98.26 | 39.34 | 66.09 | 0.040 (-0.096 to 0.144) |
| QTfri | 1.49 (1.14 to 1.94)** | 1.25 (0.95 to 1.67) | - | 2.51 | 98.35 | 44.00 | 66.18 | 0.029 (-0.047 to 0.141) |
| QTfra | 1.50 (1.15 to 1.96)** | 1.29 (0.98 to 1.71) | - | 2.51 | 98.40 | 44.72 | 66.19 | 0.031 (-0.031 to 0.127) |
| QTh | 1.60 (1.23 to 2.07)*** | 1.25 (0.94 to 1.66) | - | 2.65 | 98.42 | 46.40 | 66.23 | 0.032 (-0.038 to 0.135) |
| **Women** |  |  |  |  |  |  |  |  |
| QTb | 2.12 (1.75 to 2.56)*** | 1.64 (1.34 to 2.01)*** | - | 3.51 | 98.38 | 31.12 | 80.39 | 0.038 (-0.057 to 0.063) |
| QTfri | 1.84 (1.51 to 2.25)*** | 1.63 (1.31 to 2.02)*** | - | 3.22 | 98.18 | 26.90 | 82.97 | 0.031 (-0.132 to 0.050) |
| QTfra | 1.65 (1.34 to 2.03)*** | 1.52 (1.22 to 1.90)*** | - | 2.96 | 98.08 | 24.33 | 82.92 | 0.021 (-0.143 to 0.035) |
| QTh | 1.73 (1.40 to 2.14)*** | 1.50 (1.19 to 1.88)** | - | 2.86 | 98.25 | 25.36 | 82.92 | 0.027 (-0.123 to 0.054) |
| **All participants** | |  |  |  |  |  |  |  |
| QTb | 1.77 (1.51 to 2.08)*** | 1.48 (1.25 to 1.76)*** | 0.11 | 2.97 | 98.35 | 33.26 | 78.55 | 0.035 (-0.027 to 0.055) |
| QTfri | 1.67 (1.43 to 1.96)*** | 1.46 (1.23 to 1.73)*** | 0.14 | 2.93 | 98.22 | 31.24 | 78.51 | 0.030 (-0.037 to 0.052) |
| QTfra | 1.56 (1.32 to 1.83)*** | 1.41 (1.19 to 1.68)*** | 0.36 | 2.78 | 98.15 | 29.38 | 78.48 | 0.023 (-0.041 to 0.038) |
| QTh | 1.66 (1.41 to 1.96)*** | 1.38 (1.15 to 1.65)*** | 0.32 | 2.78 | 98.28 | 30.93 | 78.50 | 0.027 (-0.053 to 0.046) |
| **CVD mortality** | | | | | | | | |
| **Men** |  |  |  |  |  |  |  |  |
| QTb | 1.32 (0.78 to 2.24) | 1.12 (0.63 to 1.99) | - | 2.19 | 98.10 | 11.11 | 90.22 | 0.023 (-0.132 to 0.125) |
| QTfri | 1.78 (1.13 to 2.82)* | 1.28 (0.77 to 2.10) | - | 2.97 | 98.12 | 14.73 | 90.29 | 0.019 (-0.168 to 0.165) |
| QTfra | 1.80 (1.14 to 2.84)* | 1.29 (0.78 to 2.12) | - | 2.97 | 98.16 | 14.96 | 90.30 | 0.029 (-0.110 to 0.102) |
| QTh | 1.72 (1.07 to 2.74)* | 1.12 (0.66 to 1.91) | - | 2.82 | 98.11 | 13.95 | 90.28 | 0.022 (-0.128 to 0.102) |
| **Women** |  |  |  |  |  |  |  |  |
| QTb | 3.07 (2.30 to 4.10)*** | 2.26 (1.66 to 3.09)*** | - | 4.89 | 98.23 | 13.68 | 94.74 | 0.055 (-0.234 to 0.128) |
| QTfri | 2.69 (1.99 to 3.64)*** | 2.26 (1.63 to 3.13)*** | - | 4.48 | 98.07 | 11.76 | 94.71 | 0.050 (-0.436 to 0.102) |
| QTfra | 2.31 (1.68 to 3.19)*** | 2.09 (1.49 to 2.93)*** | - | 3.97 | 98.01 | 10.29 | 94.68 | 0.036 (-0.554 to 0.074) |
| QTh | 2.25 (1.60 to 3.15)*** | 1.79 (1.23 to 2.59)** | - | 3.56 | 98.14 | 9.92 | 94.66 | 0.031 (-0.224 to 0.082) |
| **All participants** | |  |  |  |  |  |  |  |
| QTb | 2.35 (1.82 to 3.03)*** | 1.83 (1.40 to 2.40)*** | 0.05 | 3.82 | 98.19 | 12.99 | 93.54 | 0.038 (-0.098 to 0.079) |
| QTfri | 2.30 (1.79 to 2.96)*** | 1.82 (1.39 to 2.39)*** | 0.07 | 3.89 | 98.09 | 12.52 | 93.54 | 0.042 (-0.197 to 0.085) |
| QTfra | 2.07 (1.59 to 2.70)*** | 1.72 (1.30 to 2.28)*** | 0.15 | 3.58 | 98.05 | 11.46 | 93.52 | 0.033 (-0.292 to 0.063) |
| QTh | 2.02 (1.53 to 2.65)*** | 1.48 (1.09 to 2.00)* | 0.19 | 3.27 | 98.13 | 10.99 | 93.50 | 0.030 (-0.123 to 0.084) |
| **incident CVD** | | | | | | | | |
| **Men** |  |  |  |  |  |  |  |  |
| QTb | 1.07 (0.76 to 1.52) | 0.84 (0.57 to 1.24) | - | 1.78 | 98.01 | 25.40 | 72.38 | 0.044 (-0.086 to 0.184) |
| QTfri | 1.43 (1.05 to 1.95)* | 1.07 (0.77 to 1.50) | - | 2.28 | 98.14 | 31.78 | 72.50 | -0.068 (-0.228 to 0.194) |
| QTfra | 1.39 (1.02 to 1.90)* | 1.05 (0.74 to 1.47) | - | 2.22 | 98.15 | 31.50 | 72.50 | -0.080 (-0.219 to 0.193) |
| QTh | 1.51 (1.11 to 2.05)** | 1.07 (0.76 to 1.50) | - | 2.34 | 98.15 | 32.56 | 72.52 | -0.064 (-0.193 to 0.214) |
| **Women** |  |  |  |  |  |  |  |  |
| QTb | 1.62 (1.33 to 1.98)*** | 1.27 (1.03 to 1.58)* | - | 2.70 | 98.26 | 28.77 | 79.48 | 0.046 (0.010-0.067) |
| QTfri | 1.45 (1.18 to 1.77)*** | 1.25 (1.00 to 1.57)* | - | 2.59 | 98.07 | 25.94 | 79.43 | 0.032 (-0.017 to 0.054) |
| QTfra | 1.38 (1.12 to 1.69)** | 1.23 (0.99 to 1.54) | - | 2.54 | 98.02 | 25.07 | 79.42 | 0.026 (-0.014 to 0.050) |
| QTh | 1.43 (1.16 to 1.76)** | 1.27 (1.01 to 1.59)* | - | 2.41 | 98.17 | 25.50 | 79.42 | 0.029 (-0.022 to 0.052) |
| **All participants** | |  |  |  |  |  |  |  |
| QTb | 1.44 (1.21 to 1.71)*** | 1.14 (0.95 to 1.38) | 0.08 | 2.40 | 98.20 | 27.88 | 77.60 | 0.042 (-0.032 to 0.055) |
| QTfri | 1.43 (1.20 to 1.69)*** | 1.20 (0.99 to 1.44) | 0.54 | 2.49 | 98.09 | 27.44 | 77.60 | 0.031 (-0.031 to 0.042) |
| QTfra | 1.36 (1.15 to 1.62)*** | 1.17 (0.97 to 1.41) | 0.51 | 2.44 | 98.05 | 26.68 | 77.58 | 0.025 (-0.021 to 0.048) |
| QTh | 1.44 (1.21 to 1.71)*** | 1.20 (0.99 to 1.45) | 0.48 | 2.38 | 98.16 | 27.39 | 77.59 | 0.027 (-0.088 to 0.046) |

CI, confidence interval; CVD, cardiovascular disease; HR, hazard ratio; IDI, integrated discrimination index; NPV, negative predictive value; NRI, net reclassification improvement; PPV, positive predictive value; QTb, Bazett formula; QTc, corrected QT; QTfra, Framingham formula; QTfri, Fridericia formula; QTh, Hodges formula; Sens, sensitivity; Spec, specificity.

*: *P* < 0.05; **: *P* < 0.01; ***: *P* < 0.001

a: Hazard ratios were adjusted for age, education, occupation, annual household income, smoking status, alcohol use, physical activity, hypertension, diabetes, left ventricular hypertrophy, body mass index and triglyceride. (HR for all participants additionally adjusted for sex.)

Supplementary Table 5. Rates and HRs (95% CIs) of specific CVD for prolonged QTc (≥98th percentile) in Guangzhou Biobank Cohort Study from 2003 to 2008 and followed up until July 2022.

| QTc | Number of events  (Rate, per 1,000 person-years) | | Crude HR  (95% CI) | Adjusted HR  (95% CI) a | *P* for sex  interaction |
| --- | --- | --- | --- | --- | --- |
| Normal | Prolonged |
| **Coronary heart disease** | | | | | |
| QTb | 2,303 (6.47) | 67 (10.50) | 1.68 (1.32 to 2.14)*** | 1.36 (1.04 to 1.77)* | 0.38 |
| QTfri | 2,302 (6.48) | 68 (10.17) | 1.63 (1.28 to 2.07)*** | 1.41 (1.09 to 1.84)* | 0.93 |
| QTfra | 2,304 (6.49) | 66 (9.68) | 1.54 (1.21 to 1.97)** | 1.38 (1.06 to 1.80)* | 0.90 |
| QTh | 2,308 (6.49) | 62 (9.69) | 1.55 (1.20 to 1.99)** | 1.27 (0.96 to 1.69) | 0.54 |
| **Myocardial infarction** | | | | | |
| QTb | 952 (2.63) | 31 (4.75) | 1.88 (1.31 to 2.68)** | 1.68 (1.16 to 2.43)** | 0.11 |
| QTfri | 952 (2.63) | 31 (4.52) | 1.79 (1.25 to 2.56)** | 1.52 (1.03 to 2.24)* | 0.10 |
| QTfra | 949 (2.63) | 34 (4.87) | 1.92 (1.37 to 2.71)*** | 1.67 (1.15 to 2.42)** | 0.06 |
| QTh | 953 (2.63) | 30 (4.57) | 1.80 (1.25 to 2.60)** | 1.52 (1.02 to 2.27)* | 0.26 |
| **Ischemic event (coronary heart disease or ischemic stroke)** | | | | | |
| QTb | 4,294 (12.38) | 111 (17.89) | 1.50 (1.25 to 1.82)*** | 1.23 (1.00 to 1.51)* | 0.20 |
| QTfri | 4,292 (12.39) | 113 (17.32) | 1.46 (1.21 to 1.76)*** | 1.24 (1.01 to 1.52)* | 0.62 |
| QTfra | 4,295 (12.40) | 110 (16.58) | 1.39 (1.15 to 1.68)** | 1.20 (0.98 to 1.48) | 0.63 |
| QTh | 4,294 (12.38) | 111 (17.93) | 1.51 (1.25 to 1.83)*** | 1.27 (1.03 to 1.56)* | 0.64 |
| **Heart failure** | | | | | |
| QTb | 245 (0.67) | 5 (0.76) | 1.21 (0.50 to 2.92) | 0.96 (0.36 to 2.59) | 0.13 |
| QTfri | 244 (0.67) | 6 (0.86) | 1.39 (0.62 to 3.13) | 1.49 (0.66 to 3.35) | 0.04 |
| QTfra | 243 (0.67) | 7 (0.99) | 1.59 (0.75 to 3.38) | 1.71 (0.80 to 3.63) | / |
| QTh | 244 (0.67) | 6 (0.90) | 1.46 (0.65 to 3.28) | 1.23 (0.50 to 2.99) | / |
| **Stroke** | | | | | |
| QTb | 3,071 (8.73) | 69 (10.83) | 1.28 (1.01 to 1.62)* | 1.00 (0.77 to 1.30) | 0.23 |
| QTfri | 3,064 (8.72) | 76 (11.36) | 1.34 (1.07 to 1.68)* | 1.07 (0.83 to 1.38) | 0.76 |
| QTfra | 3,067 (8.73) | 73 (10.72) | 1.26 (0.99 to 1.59) | 1.03 (0.80 to 1.33) | 0.99 |
| QTh | 3,065 (8.71) | 75 (11.82) | 1.40 (1.11 to 1.76)** | 1.14 (0.88 to 1.46) | 0.43 |
| **Ischemic stroke** | | | | | |
| QTb | 2,111 (5.81) | 46 (6.59) | 1.51 (1.12 to 2.02)** | 1.18 (0.86 to 1.62) | 0.21 |
| QTfri | 2,105 (5.79) | 52 (7.49) | 1.71 (1.30 to 2.25)*** | 1.35 (0.99 to 1.83) | 0.13 |
| QTfra | 2,106 (5.80) | 51 (7.21) | 1.70 (1.29 to 2.25)*** | 1.37 (1.01 to 1.87)* | 0.14 |
| QTh | 2,102 (5.78) | 55 (8.29) | 1.93 (1.48 to 2.53)*** | 1.51 (1.12 to 2.03)** | 0.06 |
| **Hemorrhagic stroke** | | | | | |
| QTb | 373 (1.03) | 10 (1.51) | 1.49 (0.80 to 2.79) | 1.22 (0.63 to 2.37) | 0.59 |
| QTfri | 374 (1.03) | 9 (1.30) | 1.27 (0.66 to 2.46) | 1.09 (0.54 to 2.20) | 0.82 |
| QTfra | 374 (1.03) | 9 (1.27) | 1.24 (0.64 to 2.41) | 1.08 (0.54 to 2.18) | 0.81 |
| QTh | 374 (1.03) | 9 (1.36) | 1.33 (0.69 to 2.58) | 1.11 (0.55 to 2.23) | 0.85 |

CI, confidence interval; CVD, cardiovascular disease; HR, hazard ratio; QTb, Bazett formula; QTc, corrected QT; QTfra, Framingham formula; QTfri, Fridericia formula; QTh, Hodges formula.

*: *P* < 0.05; **: *P* < 0.01; ***: *P* < 0.001

a: Hazard ratios were adjusted for sex, age, education, occupation, annual household income, smoking status, alcohol use, physical activity, hypertension, diabetes, left ventricular hypertrophy, body mass index and triglyceride.


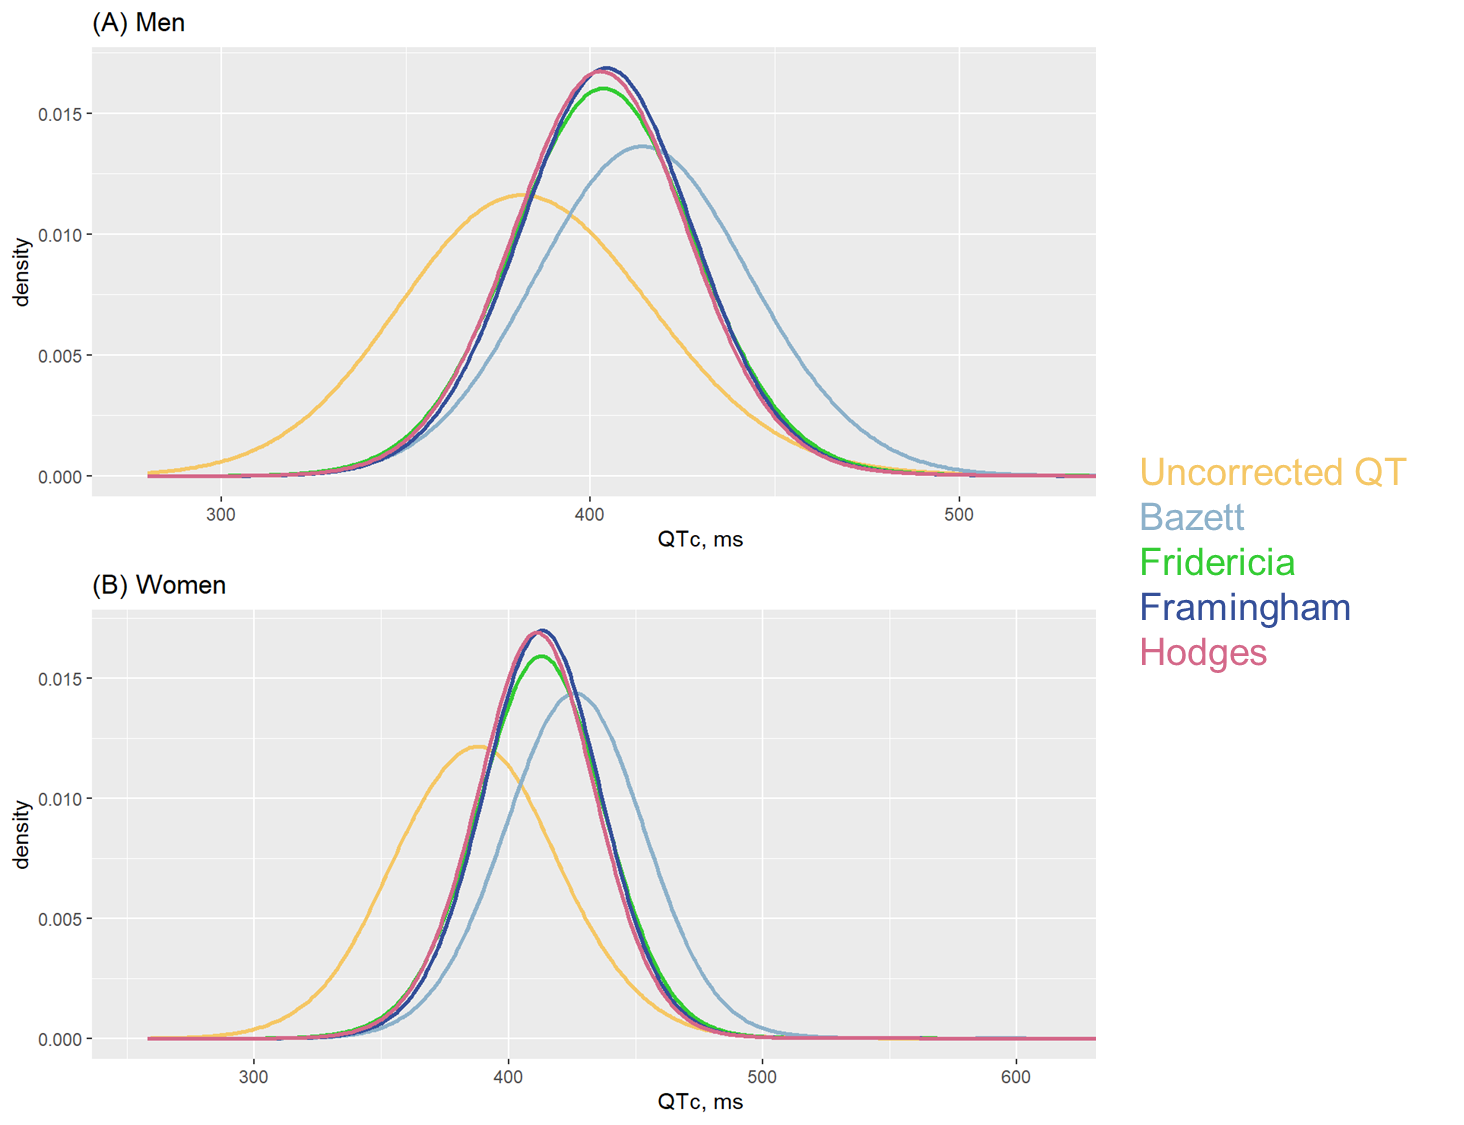


Supplementary Figure 1. Distribution of the uncorrected and corrected QT (QTc) in men (A) and women (B).
